# Supplementary material for: Yeast Starter Culture Identification to Produce of Red Wines with Enhanced Antioxidant Content
Source: MDPI journal article supplement (doi:10.3390/foods13020312), 2024-01-18
Supplement: s1 [file s1]

**Table S1.** List of yeast strains used.

| ID | Denomination | ITEM code |
|----|--------------|-----------|
| 1  | 1TTA5        | 6951      |
| 2  | 2TTA6        | 6952      |
| 3  | 3TTA8        | 6953      |
| 4  | 4TTA9        | 6954      |
| 5  | 6TTA13       | 6956      |
| 6  | 9TTA22       | 6957      |
| 7  | 11TTA27      | 6958      |
| 8  | 17TTA38      | 6962      |
| 9  | 18TTA47      | 6964      |
| 10 | 25TTB16      | 6955      |
| 11 | 26TTB21      | 6968      |
| 12 | 31TTB33      | 6969      |
| 13 | 34TTB46      | 6971      |
| 14 | 35TTB47      | 6972      |
| 15 | 36TTB50      | 6963      |
| 16 | 1MMA2        | 6973      |
| 17 | 2MMA4        | 6974      |
| 18 | 3MMA11       | 6975      |
| 19 | 8MMA26       | 6977      |
| 20 | 10MMA41      | 6978      |
| 21 | 11MMA50      | 6979      |
| 22 | 13MMB5       | 6980      |
| 23 | 14MMB6       | 6981      |
| 24 | 24MMB25      | 6984      |
| 25 | 25MMB27      | 6985      |
| 26 | 27MMB31      | 6986      |
| 27 | 33MMB47      | 6989      |
| 28 | 4CA93        | 6904      |
| 29 | 4CA107       | 6905      |
| 30 | 4CA116       | 6907      |
| 31 | 4CB2         | 6908      |
| 32 | 4CB27        | 6909      |
| 33 | 4CB31        | 6910      |
| 34 | 4CB47        | 6911      |
| 35 | 4CB64        | 6912      |
| 36 | 4CB77        | 6914      |
| 37 | 4CC4         | 6916      |
| 38 | 4CC104       | 6917      |
| 39 | 5CA62        | 6918      |
| 40 | 5CB10        | 6919      |
| 41 | 5CC23        | 6921      |
| 42 | 5CC76        | 6922      |
| 43 | 5CC129       | 6923      |
| 44 | KA2          | 6924      |
| 45 | KA4          | 6925      |
| 46 | KA8          | 6926      |
| 47 | KA33         | 6927      |
| 48 | KA37         | 6928      |

---

|     |          |       |
|-----|----------|-------|
| 49  | KA46     | 6929  |
| 50  | KB6      | 6930  |
| 51  | KB10     | 6931  |
| 52  | KB13     | 6932  |
| 53  | KB26     | 6937  |
| 54  | KC13     | 6945  |
| 55  | KC16     | 6946  |
| 56  | GA3G2    | 8743  |
| 57  | GA12G4   | 8746  |
| 58  | GA25G6   | 8747  |
| 59  | GA29G8   | 8748  |
| 60  | GA34G11  | 8749  |
| 61  | GA36G12  | 8742  |
| 62  | GB26G27  | 8752  |
| 63  | GB49G35  | 8754  |
| 64  | GA6G37   | 8744  |
| 65  | GA8G38   | 8745  |
| 66  | GA47G44  | 8750  |
| 67  | GB3G45   | 8751  |
| 68  | GB31G49  | 8753  |
| 69  | MA2M1    | 8766  |
| 70  | MA4M2    | 8767  |
| 71  | MA6M4    | 8769  |
| 72  | MA9M5    | 8770  |
| 73  | MA12M6   | 8771  |
| 74  | MA19M8   | 8772  |
| 75  | MA27M11  | 8773  |
| 76  | MA28M12  | 8774  |
| 77  | MA37M16  | 8775  |
| 78  | MB1M18   | 8776  |
| 79  | MB9M19   | 8777  |
| 80  | MB13M21  | 8778  |
| 81  | MB19M25  | 8779  |
| 82  | MB20M26  | 8780  |
| 83  | B1/TORZ  | 6993  |
| 84  | C19      | 6920  |
| 85  | TOM14    | 8760  |
| 86  | EM1/MN1  | 8766  |
| 87  | 8M       | 6977  |
| 88  | 14M      | 6981  |
| 89  | 1M4      | 8795  |
| 90  | P25      | 17292 |
| 91  | P28      | 17293 |
| 92  | S8       | 9502  |
| 93  | S39/S33  | 9518  |
| 94  | S40/SS4  | 9519  |
| 95  | S41/SS5  | 9520  |
| 96  | S71/SS35 | 9531  |
| 97  | NC103    | 14061 |
| 98  | NU32     | 14077 |
| 99  | PR12     | 14093 |
| 100 | PMR01    | 17294 |

---

---

|     |       |      |
|-----|-------|------|
| 101 | E4    | -    |
| 102 | SA6   | 9497 |
| 103 | SA18  | 9498 |
| 104 | SA27  | 9499 |
| 105 | SA23  | 9500 |
| 106 | SA1   | 9501 |
| 107 | SA41  | 9502 |
| 108 | SA37  | 9503 |
| 109 | SA9   | 9504 |
| 110 | SA28  | 9505 |
| 111 | SB16  | 9506 |
| 112 | SB21  | 9507 |
| 113 | SB43  | 9508 |
| 114 | SB46  | 9509 |
| 115 | SB35  | 9510 |
| 116 | SB8   | 9511 |
| 117 | SB30  | 9512 |
| 118 | SB24  | 9513 |
| 119 | SB48  | 9514 |
| 120 | SB52  | 9515 |
| 121 | SSA40 | 9516 |
| 122 | SSA44 | 9517 |
| 123 | SSA48 | 9518 |
| 124 | SSA13 | 9519 |
| 125 | SSA22 | 9520 |
| 126 | SSA6  | 9521 |
| 127 | SSA7  | 9522 |
| 128 | SSA20 | 9523 |
| 129 | SSA1  | 9524 |
| 130 | SSB27 | 9525 |
| 131 | SSB19 | 9526 |
| 132 | SS23  | 9527 |
| 133 | SS25  | 9528 |
| 134 | SS28  | 9529 |
| 135 | SS33  | 9530 |
| 136 | SS35  | 9531 |

---
